# Supplementary material
Source: Springer Nature journal article supplement (https://www.springermedizin.de/resource/supplementary/12990_2009_250_MOESM3_ESM.pdf/9612882)

Normal

rAAV-GFP

rAAV-shGCH1

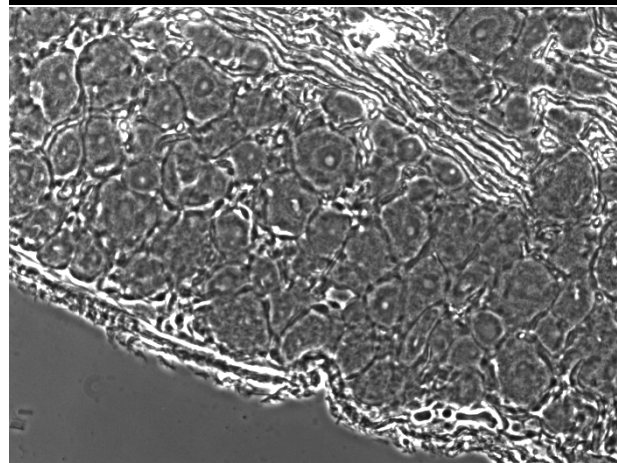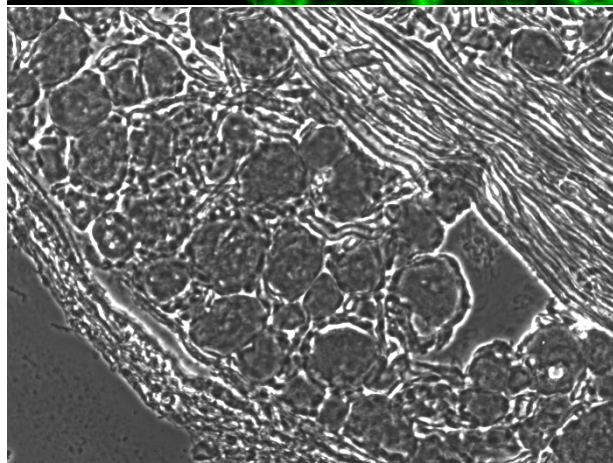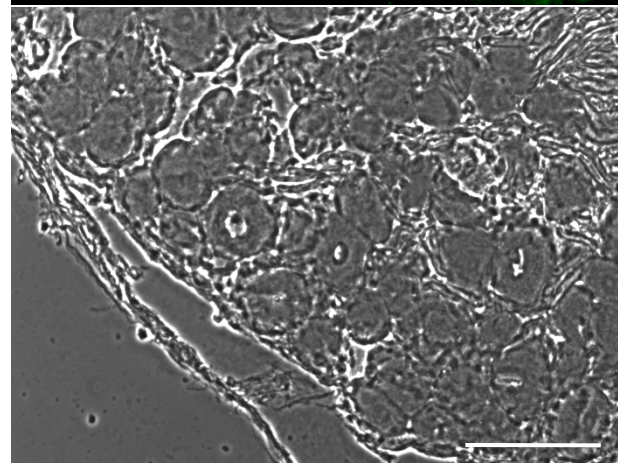

Supplement: MOESM3 [file 9612882]
